# Supplementary material
Source: PubMed Central journal article supplement (PMC5060540)
Supplement: HEX-13-323-s002.pdf [file HEX-13-323-s002.pdf]

## Cornwall Heart Attack Rehabilitation Management (CHARMS)

*Please complete the following questions by ticking/completing the most appropriate box*

### How you chose to hear about the results

**Q1 What method did you choose to hear about the results of the cardiac rehabilitation study in which you participated in?**

- Written information through the post* .....
- Attended a meeting*.....
- By telephone*.....
- Read results on the web*.....
- Via e-mail*.....

**Q2 Were you happy with the method you chose?**

- Very happy*.....
- Fairly happy* .....
- Rather unhappy*.....
- Very unhappy*.....

**Q3 If you were unhappy with the way you chose to be told about the results of the study, please use the space below to tell us why this was?**

### The results of the study

**Q4 Were you pleased that you asked to be informed of the results?**

- Yes*.....
- No* .....

**Q5 Thinking about the results did you find them ....?**

- |                                 | Yes                      | No                       |
|---------------------------------|--------------------------|--------------------------|
| <i>Easy to understand</i> ..... | <input type="checkbox"/> | <input type="checkbox"/> |
| <i>Interesting</i> .....        | <input type="checkbox"/> | <input type="checkbox"/> |
| <i>Relevant to you</i> .....    | <input type="checkbox"/> | <input type="checkbox"/> |
| <i>Upsetting</i> .....          | <input type="checkbox"/> | <input type="checkbox"/> |

**Q6 Did the results give you...?**

- Far too much detail* .....
- More detail than you needed* .....
- About the right amount of detail* .....
- Not enough detail* .....
- Far too little detail* .....

**Q7 Overall do you feel that taking part in this research was..?**

- Very valuable* .....
- Worthwhile* .....
- Not very valuable* .....
- Not at all valuable* .....

**Q8 Please feel free to use the space below to tell us about anything else to do with the method (the way you chose to find out the results) and the results of the study that you feel you would like us to know.**

**Many thanks for taking the time to complete this questionnaire. Please return in the stamped addressed envelope to: -**

**Mrs Sharon Northey, Research and Development, Knowledge Spa,  
Royal Cornwall Hospitals Trust, Truro, TR1 3HD**
