# Supplementary material
Source: PubMed Central journal article supplement (PMC5060540)
Supplement: HEX-13-323-s003.pdf [file HEX-13-323-s003.pdf]

Study No. \_\_\_\_\_

# Cornwall Heart Attack Rehabilitation Management Study (CHARMS) Results

*Please complete the questions by ticking/completing the appropriate box*

**Q1 I would like to be informed of the results of this study...**

Yes.....

No .....

*If you have answered no, it would be really helpful to our research if you could let us know why you have made this choice.*

***If you have answered 'No' to Q1 please go to Q4***

**Q2 I would prefer to receive the results by...**

*Written information through the post*.....

*Attend a meeting with other patients where the results are presented by members of the Research team (Dr Dalal and Jenny Wingham)*.....

*By telephone*.....

*Please give a contact telephone number*

*View results on the web (internet)*.....

*Via an e-mail*.....

*Please write your e-mail address*

**Q4 We are thinking of a further research study to see how participants in this study have managed over the last few years. Would you be happy for us to contact you about this?**

Yes.....

No .....

Please return using the stamped addressed envelope to: -

Mrs Northey, Research and Development, Knowledge Spa  
Royal Cornwall Hospitals Trust, Truro, TR1 3HD
